# Supplementary material
Source: PubMed Central journal article supplement (PMC3242163)

# THE LANCET

## **Supplementary webappendix**

This webappendix formed part of the original submission and has been peer reviewed. We post it as supplied by the authors.

Supplement to: Heart Protection Study Collaborative Group. Effects on 11-year mortality and morbidity of lowering LDL cholesterol with simvastatin for about 5 years in 20 536 high-risk individuals: randomised controlled trial. *Lancet* 2011; published online Nov 23. DOI:10.1016/S0140-6736(11)61125-2.

## **Webappendix for “Effects on 11 year mortality and morbidity of lowering LDL cholesterol with simvastatin for about 5 years in 20,536 high-risk individuals”**

### **Tables**

|                                                                                                                     |   |
|---------------------------------------------------------------------------------------------------------------------|---|
| Previously reported post-trial follow-up of vascular outcomes in randomised statin trials                           | 1 |
| Previously reported post-trial and in-trial follow-up of combined non-vascular outcomes in randomised statin trials | 2 |

### **Figures**

|                                                                                                        |   |
|--------------------------------------------------------------------------------------------------------|---|
| Major vascular events during in-trial and post-trial follow-up subdivided by baseline characteristics  | 3 |
| Cause-specific mortality during in-trial and post-trial follow-up                                      | 4 |
| Vascular mortality during in-trial and post-trial follow-up                                            | 5 |
| Non-vascular mortality during in-trial and post-trial follow-up subdivided by baseline characteristics | 6 |
| Cancer incidence during total follow-up period subdivided by baseline characteristics                  | 7 |

**Webtable 1: Previously reported post-trial follow-up of vascular outcomes in randomised statin trials**

| Trial     | In-trial randomised statin comparison | Post-trial follow-up | Clinical outcome          | Post-trial events by original allocation |              |                  |
|-----------|---------------------------------------|----------------------|---------------------------|------------------------------------------|--------------|------------------|
|           |                                       |                      |                           | Statin                                   | Placebo      | OR (95% CI)      |
| 4S        | 20-40 mg S daily vs placebo for 5 y   | 5 y                  | Vascular mortality        | 155 (7.7%)                               | 128 (6.6%)   | 1.14 (0.90-1.44) |
| LIPID     | 40 mg P daily vs placebo for 5 y      | 2 y                  | Vascular mortality        | 130 (3.3%)                               | 163 (4.3%)   | 0.76 (0.60-0.96) |
| WOSCOPS   | 40 mg P daily vs placebo for 6 y      | 10 y                 | Non-fatal MI or CHD death | 268 (8.6%)                               | 310 (10.3%)  | 0.82 (0.69-0.96) |
|           |                                       |                      | Non-fatal or fatal stroke | 161 (5.1%)                               | 176 (5.6%)   | 0.88 (0.71-1.08) |
| ASCOT-LLA | 10 mg A daily vs placebo for 3 y      | 2 y                  | Non-fatal MI or CHD death | 59 (1.2%)                                | 91 (1.9%)    | 0.63 (0.45-0.87) |
| HPS       | 40 mg S daily vs placebo for 5 y      | 6 y                  | Major Vascular Event      | 1636 (21.7%)                             | 1566 (22.5%) | 0.95 (0.89-1.02) |

S=simvastatin; P=pravastatin; A=atorvastatin; MI=myocardial infarction; CHD=coronary heart disease

**Webtable 2: Previously reported post-trial and in-trial follow-up of combined non-vascular outcomes in randomised statin trials**

| Trial     | In-trial randomised statin comparison | In-trial + post-trial follow-up | Clinical outcome       | In-trial and post-trial events by original allocation |              |                  |
|-----------|---------------------------------------|---------------------------------|------------------------|-------------------------------------------------------|--------------|------------------|
|           |                                       |                                 |                        | Statin                                                | Placebo      | OR (95% CI)      |
| 4S        | 20-40mg S daily vs placebo for 5 y    | 5 + 5 y                         | Non-vascular mortality | 123 (6.3%)                                            | 133 (6.7%)   | 0.89 (0.70-1.14) |
|           |                                       |                                 | All cancer incidence   | 227 (11.7%)                                           | 248 (13.9%)  | 0.88 (0.73-1.05) |
| LIPID     | 40mg P daily vs placebo for 5 y       | 5 + 2 y                         | Non-vascular mortality | 256 (5.7%)                                            | 292 (6.5%)   | 0.87 (0.73-1.03) |
|           |                                       |                                 | All cancer incidence   | 499 (11.1%)                                           | 526 (11.7%)  | 0.91 (0.81-1.03) |
| WOSCOPS   | 40mg P daily vs placebo for 6 y       | 6 + 10 y                        | Non-vascular mortality | 367 (11.1%)                                           | 377 (11.4%)  | 0.94 (0.82-1.09) |
|           |                                       |                                 | All cancer incidence   | 431 (13.1%)                                           | 404 (12.3%)  | 1.05 (0.92-1.20) |
| ASCOT-LLA | 10mg A daily vs placebo for 3 y       | 3 + 2 y                         | Non-vascular mortality | 247 (4.8%)                                            | 284 (5.5%)   | 0.86 (0.72-1.02) |
| HPS       | 40 mg S daily vs placebo for 5 y      | 5 + 6 y                         | Non-vascular mortality | 1523 (14.8%)                                          | 1555 (15.1%) | 0.96 (0.89-1.03) |
|           |                                       |                                 | All cancer incidence   | 1749 (17.0%)                                          | 1744 (17.0%) | 0.98 (0.92-1.05) |

S=simvastatin; P=pravastatin; A=atorvastatin; MI=myocardial infarction; CHD=coronary heart disease

**Webfigure 1: Major vascular events during in-trial and post-trial follow-up subdivided by baseline characteristics**

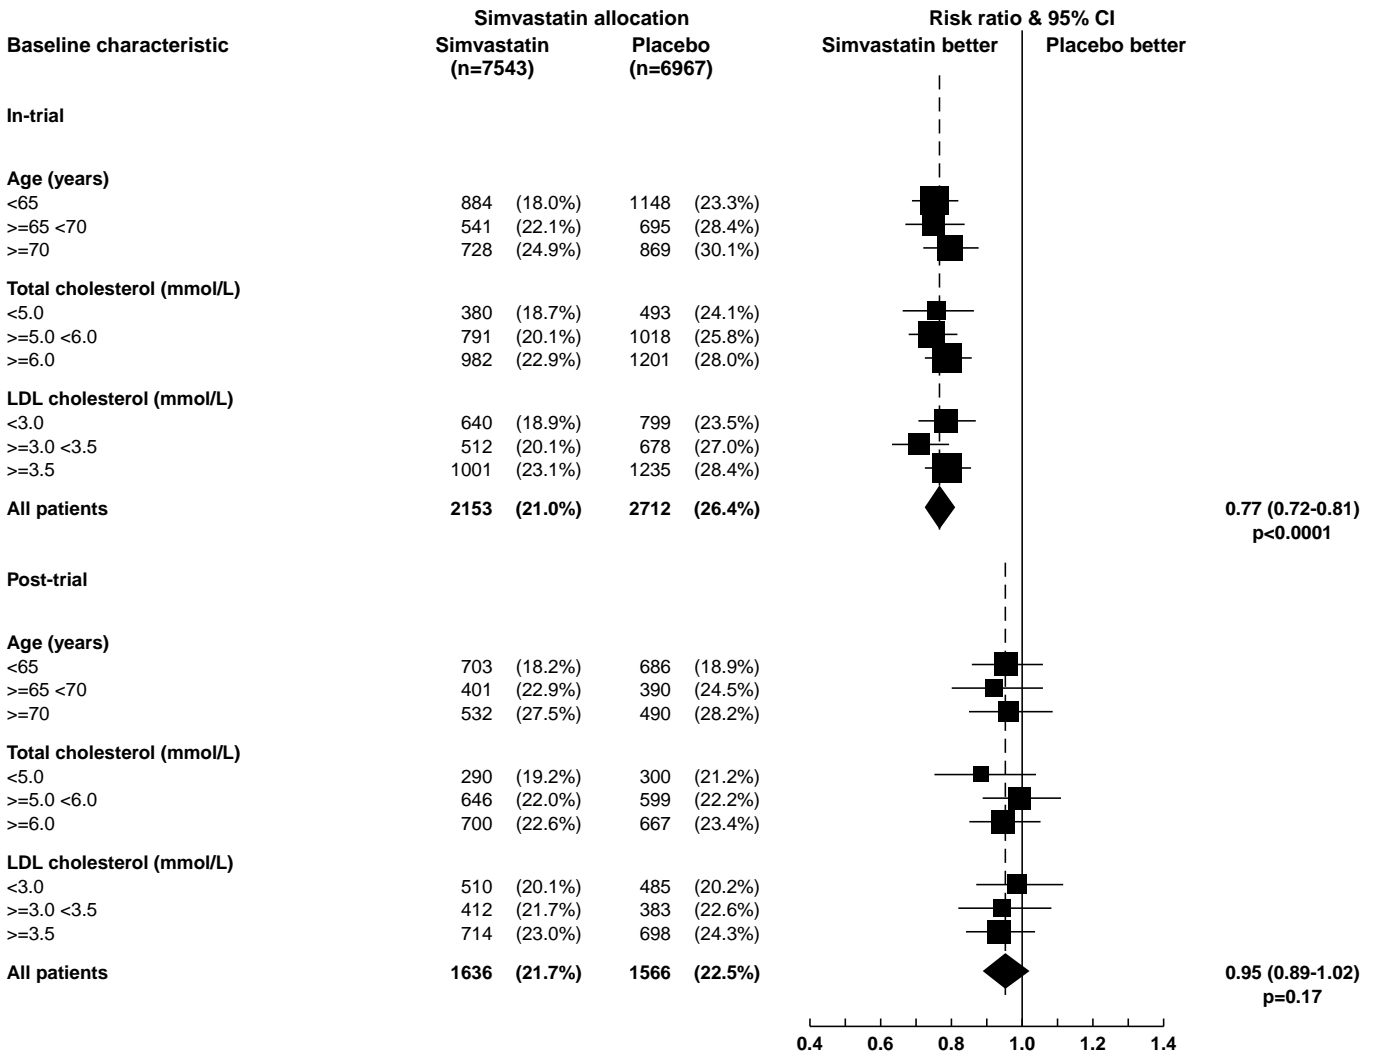

**Webfigure 2: Cause-specific mortality during in-trial and post-trial follow-up**

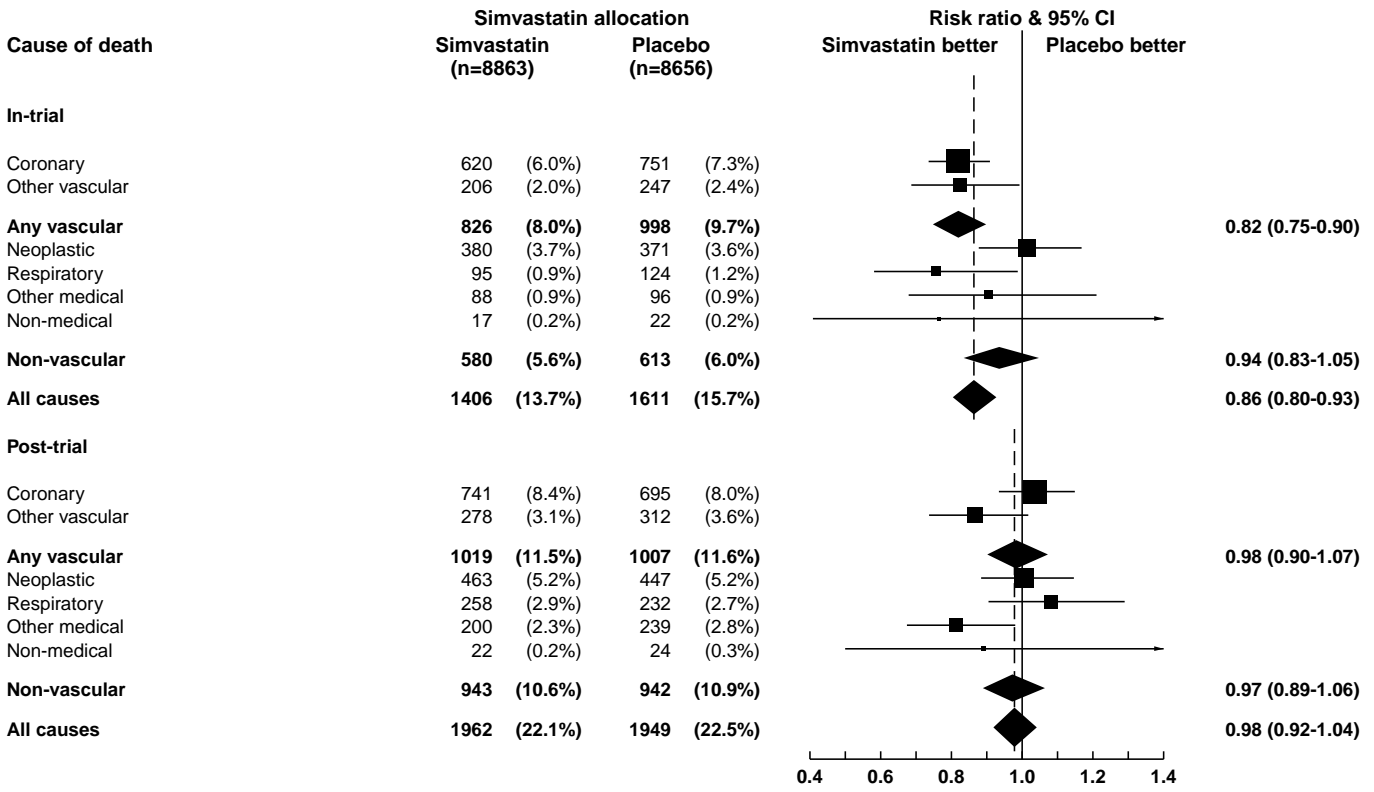

**Webfigure 3: Vascular mortality during in-trial and post-trial follow-up subdivided by baseline characteristics**

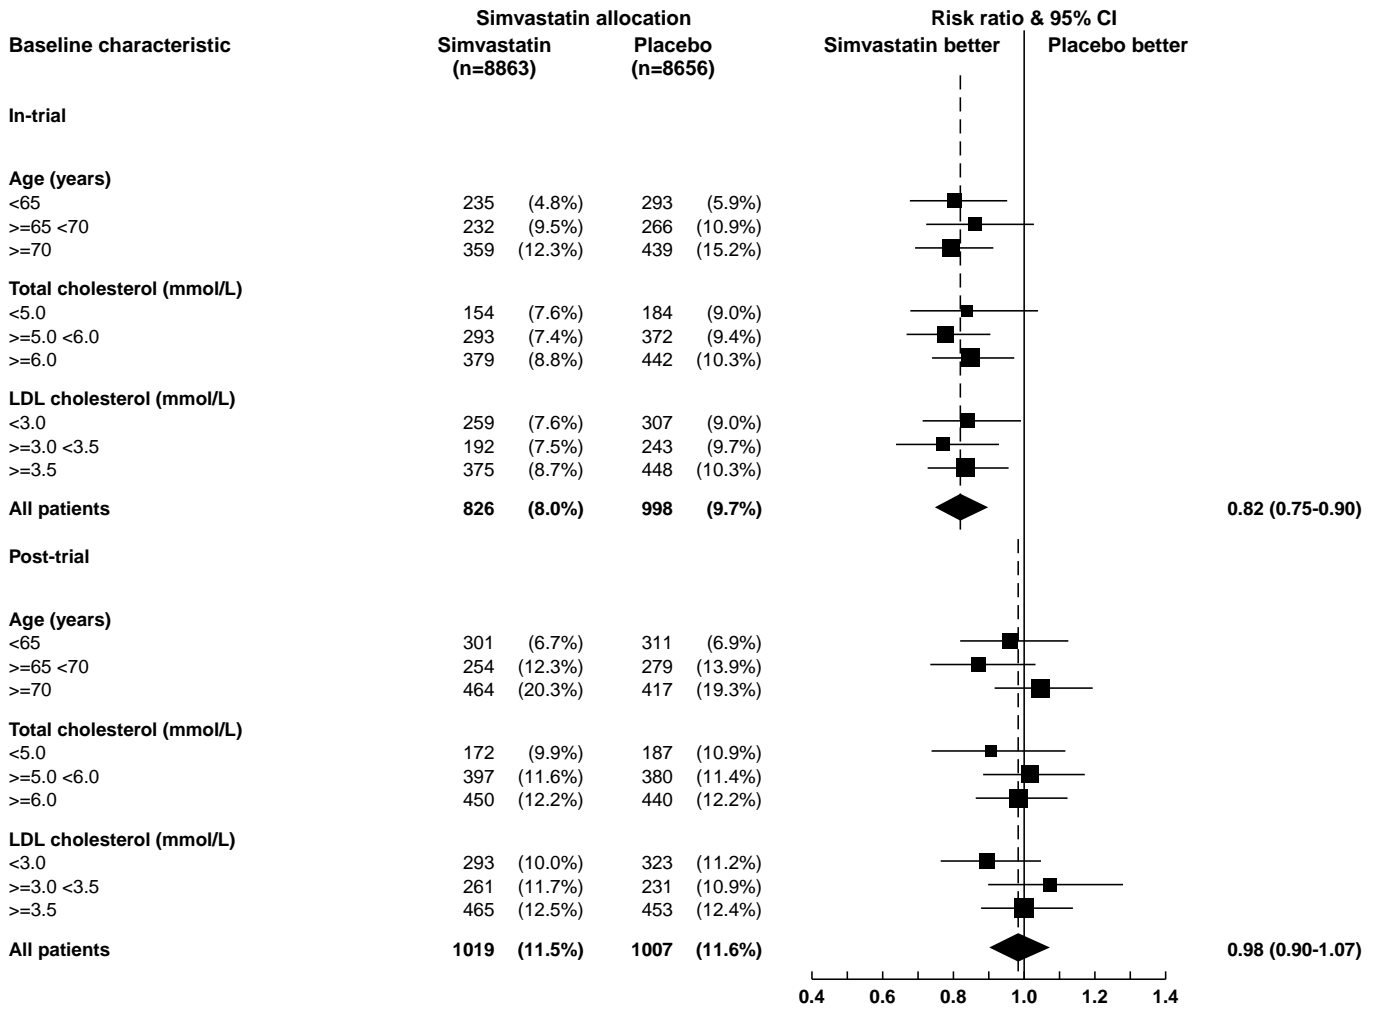

**Webfigure 4: Non-vascular mortality during in-trial and post-trial follow-up subdivided by baseline characteristics**

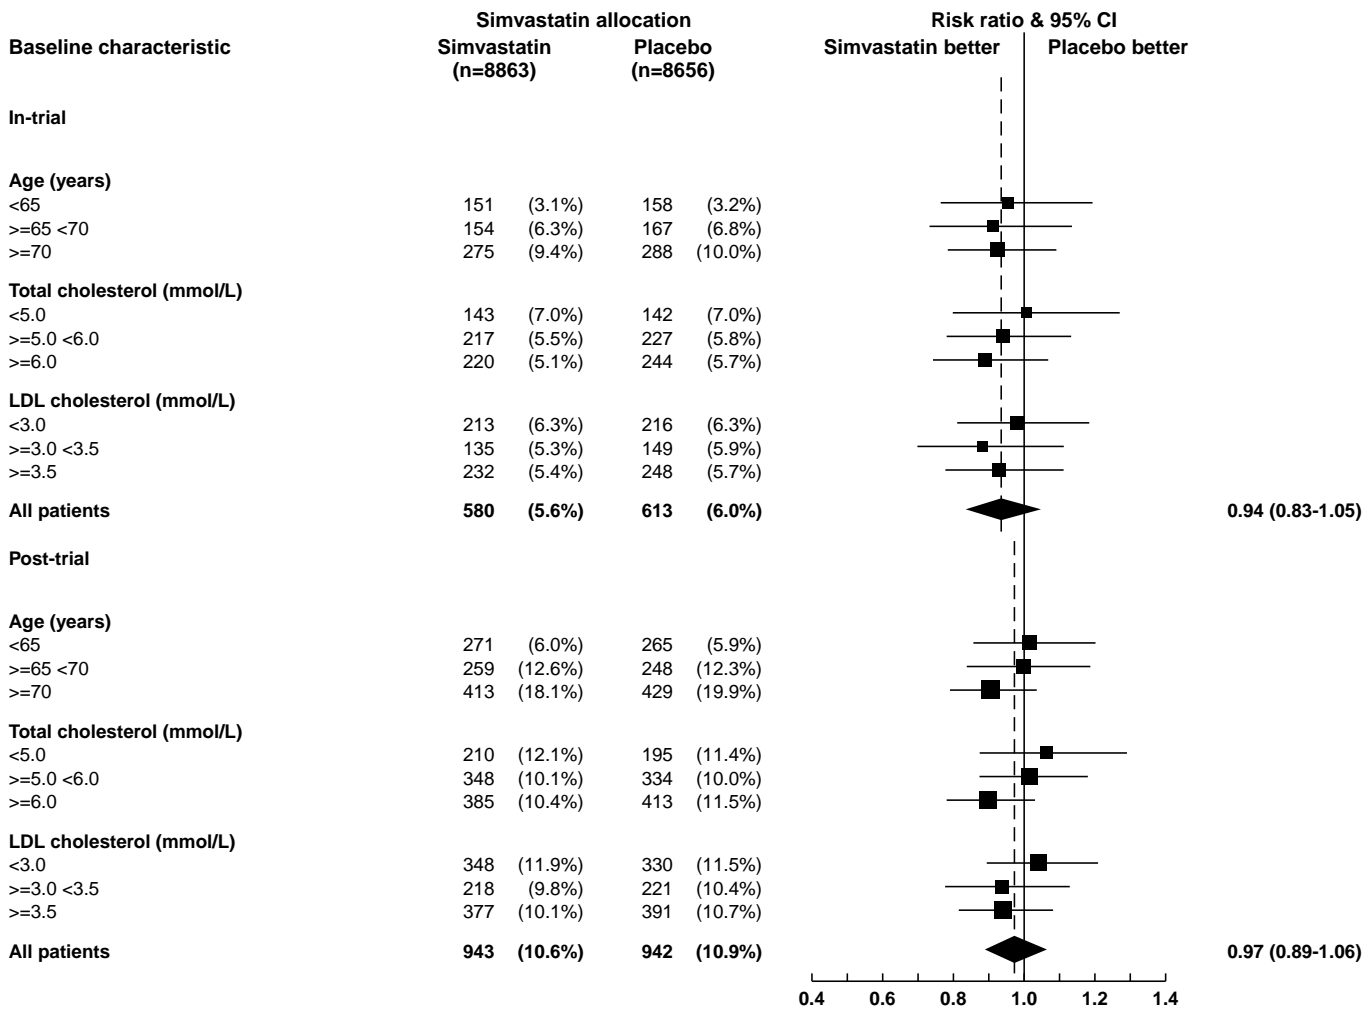



**Webfigure 5: Cancer incidence during total follow-up period subdivided by baseline characteristics**

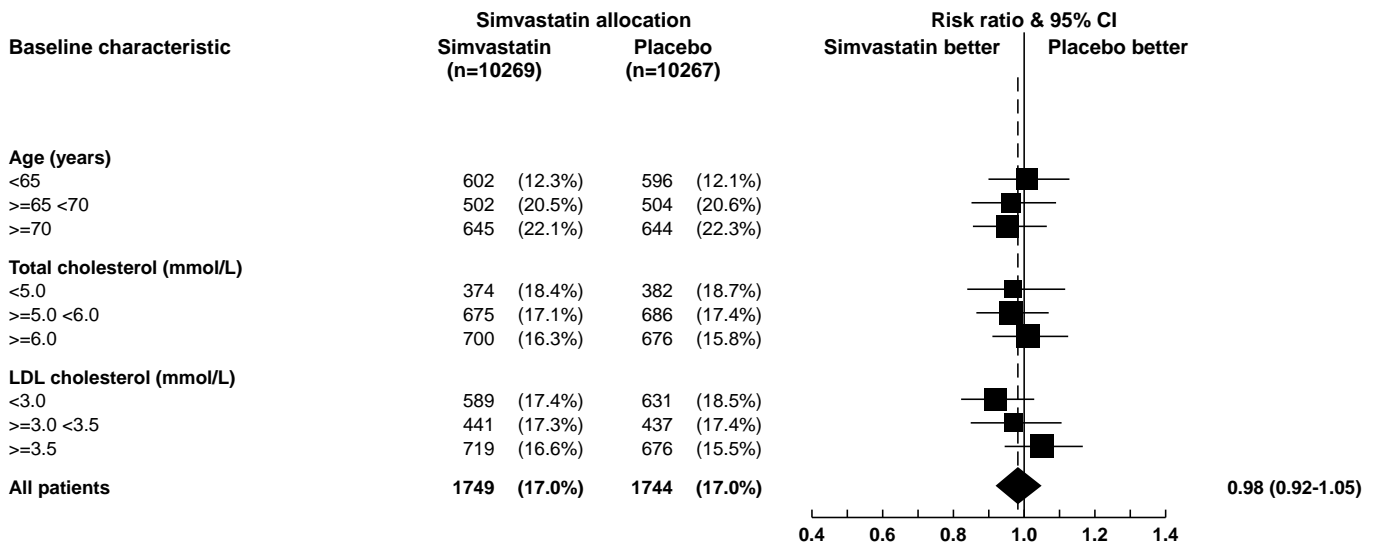

Supplement: mmc1.pdf [file mmc1.pdf]
